# Supplementary material
Source: PubMed Central journal article supplement (PMC4800870)
Supplement: JB.00896-15_zjb999093989so1.pdf [file JB.00896-15_zjb999093989so1.pdf]

SUPPLEMENTARY INFORMATION

SUPPLEMENTARY TABLES

**Table S1. Orthologs of *A. tumefaciens* UPP biosynthesis cluster in *P. hirschii***

| <i>P. hirschii</i> NCBI locus | Ortholog in <i>P. hirschii</i> | Ortholog in <i>A. tumefaciens</i> (% identity)* | General description of function# |
|-------------------------------|--------------------------------|-------------------------------------------------|----------------------------------|
| KPL55196 <sup>‡</sup>         | C1_5522 <sup>‡</sup>           | UppH<br>Atu_0482 (29%) <sup>^</sup>             | Deacetylase                      |
| KPL55195                      | C1_5521                        | UppA<br>Atu_1240 (31.3%)                        | Acetyltransferase                |
| KPL55194                      | C1_5520                        | UppB<br>Atu_1239 (35.5%)                        | MPA-1                            |
| KPL55193                      | C1_5519                        | UppC<br>Atu_1238 (63.4%)                        | Secretin                         |
| KPL55192                      | C1_5516                        | UppD<br>Atu_1237 (44.4%)                        | Glycosyltransferase              |
| KPL55191                      | C1_5515                        | UppE<br>Atu_1236 (54.2%)                        | Glycosyltransferase              |
| KPL55190                      | C1_5514                        | UppF<br>Atu_1235 (44.6%)                        | Polymerase                       |
| KPL52370                      | C1_1957                        | Atu_0480 (80%) <sup>^</sup>                     | Flippase                         |
| Not present                   | Not present                    | Atu_0481                                        | Polymerase                       |

\* % identity of bidirectional best hits to *P. hirschii* orthologs were determined using

Clustal Omega except where indicated

# general descriptions of function are provided as a reference

<sup>‡</sup> Non-syntenic *P. hirschii* locus that has higher sequence homology to *A. tumefaciens* *uppH*. NCBI locus (KPL54727), Ortholog in *P. hirschii* (C1\_4935) is the bidirectional best hit.

<sup>^</sup> Lower confidence hits due to low sequence similarity with less than 12% overall coverage

**Table S2. Orthologs of cell cycle regulators in *P. hirschii***

| Regulatory Cell Cycle Protein | <i>P. hirschii</i> NCBI locus | Ortholog in <i>P. hirschii</i> | Ortholog in <i>A. tumefaciens</i> (% identity)* | Ortholog in <i>C. crescentus</i> (% identity)* | General description of function <sup>#</sup>                 |
|-------------------------------|-------------------------------|--------------------------------|-------------------------------------------------|------------------------------------------------|--------------------------------------------------------------|
| DivJ                          | KPL52058                      | C1_1571                        | Atu_0921 (46.6%)                                | CC_1063<br>CCNA_01116 (49.2%)                  | Histidine kinase responsible for DivK phosphorylation        |
| DivK                          | KPL51044                      | C1_0307                        | Atu_1296 (80.5%)                                | CC_2463<br>CCNA_02547 (80.0%)                  | Response regulator; phosphorylation state controls cell fate |
| PleC                          | KPL54541                      | C1_4701                        | Atu_0982 (44.9%)                                | CC_2482<br>CCNA_02567 (39.8%)                  | Histidine kinase dephosphorylates DivK                       |

|                |          |         |                              |                                  |                                                                                             |
|----------------|----------|---------|------------------------------|----------------------------------|---------------------------------------------------------------------------------------------|
| PdhS1          | KPL51802 | C1_1248 | Atu_0614<br>(51.5%)          | Not present                      | Histidine kinase involved in polar differentiation                                          |
| PdhS2          | KPL51665 | C1_1072 | Atu_1888<br>(48.5%)          | Not present                      | Histidine kinase involved in polar differentiation                                          |
| CckA           | KPL51705 | C1_1122 | Atu_1362<br>(53.5%)          | CC_1078<br>CCNA_01132<br>(49.4%) | Hybrid histidine kinase; along with ChpT regulates phosphorylation state of CtrA            |
| ChpT           | KPL54390 | C1_4527 | Atu_2438<br>(52.0%)          | CC_3470<br>CCNA_03584<br>(36.0%) | Hpt phosphotransferase; along with CckA regulates phosphorylation state of CtrA             |
| CtrA           | KPL54404 | C1_4543 | Atu_2434<br>(94.2%)          | CC_3035<br>CCNA_03130<br>(82.3%) | Master regulator of cell cycle progression                                                  |
| SciP           | KPL54413 | C1_4554 | Atu_2430<br>(84.6%)          | CC_0903<br>CCNA_00948<br>(82.7%) | Accessory protein functioning in regulation of CtrA-dependent promoters                     |
| MucR2/<br>ros^ | KPL52063 | C1_1579 | Atu_0916<br>(62.3%)          | CC_0949<br>CCNA_00998<br>(66.9%) | Repressor of CtrA-activated genes                                                           |
| CpdR           | KPL55751 | C1_1840 | Atu_3883<br>(86.3%)          | CC_0744<br>CCNA_00781<br>(63.0%) | Response regulator involved in ClpXP localization                                           |
| RcdA           | KPL52102 | C1_1635 | Atu_4742<br>(55.8%)          | CC_3295<br>CCNA_03404<br>(53.3%) | Degradation factor required for ClpXP mediated proteolysis of CtrA                          |
| ClpP           | KPL55257 | C1_5596 | Atu_1258<br>(69.0%)          | CC_1963<br>CCNA_02041<br>(67.0%) | Essential ATP-dependent ClpXP protease component; responsible for CtrA proteolysis          |
| ClpX           | KPL55258 | C1_5597 | Atu_1259<br>(81.8%)          | CC_1961<br>CCNA_2039<br>(81.3%)  | Essential ATP-dependent ClpXP protease component; responsible for CtrA proteolysis          |
| CcrM           | KPL52394 | C1_1988 | Atu_0794<br>(68.7%)          | CC_0378<br>CCNA_0328<br>(65.7%)  | DNA methyltransferase; methylation state impacts cell cycle regulation                      |
| GcrA           | KPL55789 | C1_2139 | PC-6 <sup>+</sup><br>(47.2%) | CC_2245<br>CCNA_02328<br>(42.9%) | Transcriptional regulator involved in late cell cycle progression                           |
| DnaA           | KPL52602 | C1_2255 | Atu_0324<br>(52.0%)          | CC_0008<br>CCNA_00008<br>(37.0%) | Initiates DNA replication and transcriptional activator during early cell cycle progression |
| DivL           | KPL56005 | C1_4100 | Atu_0027<br>(43.2%)          | CC_3484<br>CCNA_03598<br>(35.7%) | Tyrosine kinase required for cell division and growth                                       |
| PodJ           | KPL52461 | C1_2083 | Atu_0499<br>(40.0%)          | CC_2045<br>CCNA_2125<br>(33.8%)  | Polar development protein required for localization of several polar organelles             |

21 \* % identity of bidirectional best hits to *P. hirschii* orthologs were determined using  
22 Clustal Omega  
23 # general descriptions of function are provided as a reference  
24 ^ An additional MucR paralog (C1\_2945) is present in the genome  
25 + GcrA was not annotated in the original *A. tumefaciens* genome sequence but was later  
26 identified during re-annotation (1)  
27

28 SUPPLEMENTARY FIGURES  
29

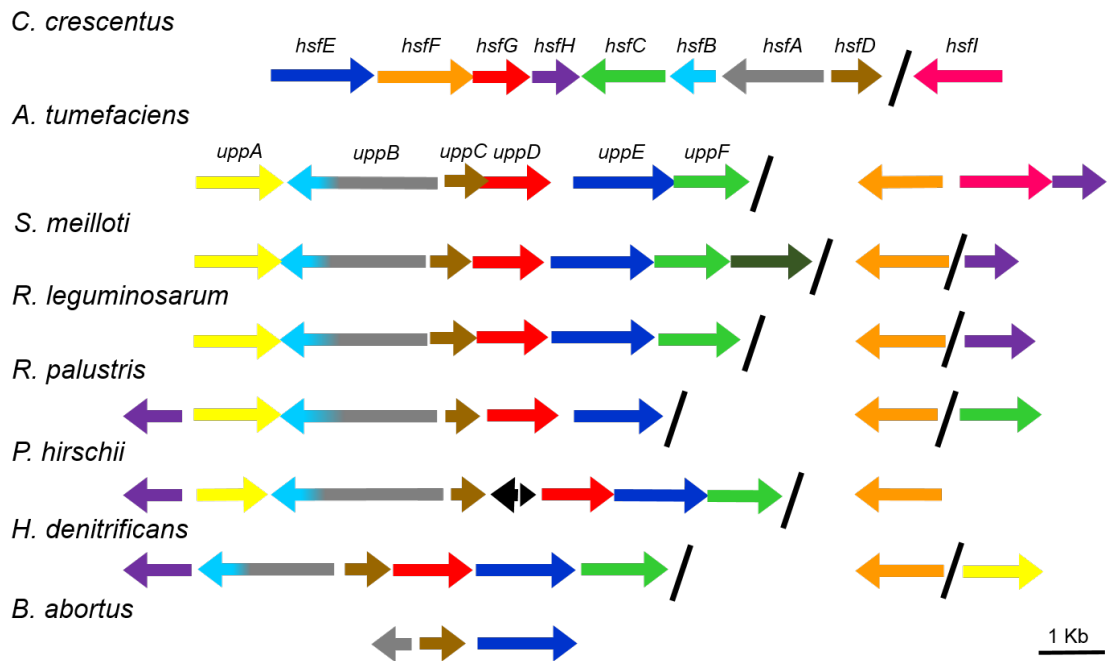

30  
31  
32  
33  
34  
35  
36  
37  
38  
39  
40  
41  
42  
43  
44  
45  
46  
47  
48

**Figure S1. Conservation of polar polysaccharide synthesis genes.** Genetic organization of the holdfast biosynthesis gene cluster in *C. crescentus* encodes genes that function as a glycosyltransferase (HsfE, dark blue arrow and HfsG, red arrow), flippase (HsfF, orange arrow), deacetylase (HsfH, purple arrow), polymerase (HsfC, light green arrow and HsfI, pink arrow), secretin (HsfD, brown arrow), autokinase (HfsB, light blue arrow), and membrane periplasmic axillary protein (HsfA, grey arrow). All of these gene products contribute to the synthesis and export of the *C. crescentus* holdfast. Gene names for the major *A. tumefaciens* unipolar polysaccharide biosynthesis cluster (*uppA-F*) are listed above each arrow. Conserved coding indicates the predicted function in polysaccharide biosynthesis as described for holdfast. In the *Rhizobiales*, *uppA* (yellow arrows) is predicted to encode an acetyltransferase, *uppB* (shaded with both light blue and grey) is a fusion of *hfsA* and *hfsB*, and flippase genes are typically found at another genomic loci. Several members of the *Rhizobiales*, including *P. hirschii*, have a *wzy*-type polysaccharide gene cluster that is similar in cluster structure to *A. tumefaciens*. Black arrows represent hypothetical proteins with no significant homology to known polysaccharide biosynthesis genes. Scale bar is 1Kb.

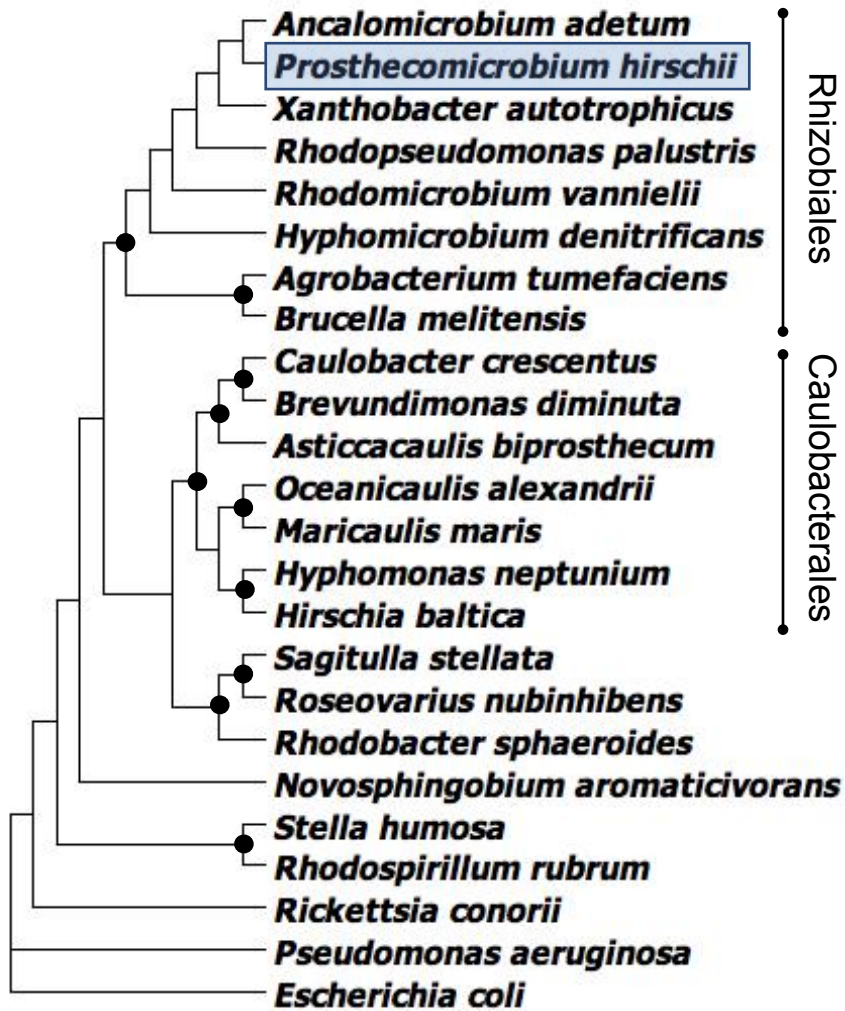

49  
50  
51  
52  
53  
54  
55

**Figure S2. Phylogeny places *P. hirschii* within the *Rhizobiales*.** Maximum likelihood phylogeny inferred from *gyrA* sequences. Node values indicate clade frequency among 100 nonparametric bootstrapped datasets. Black nodes represent bootstrap values above 90.

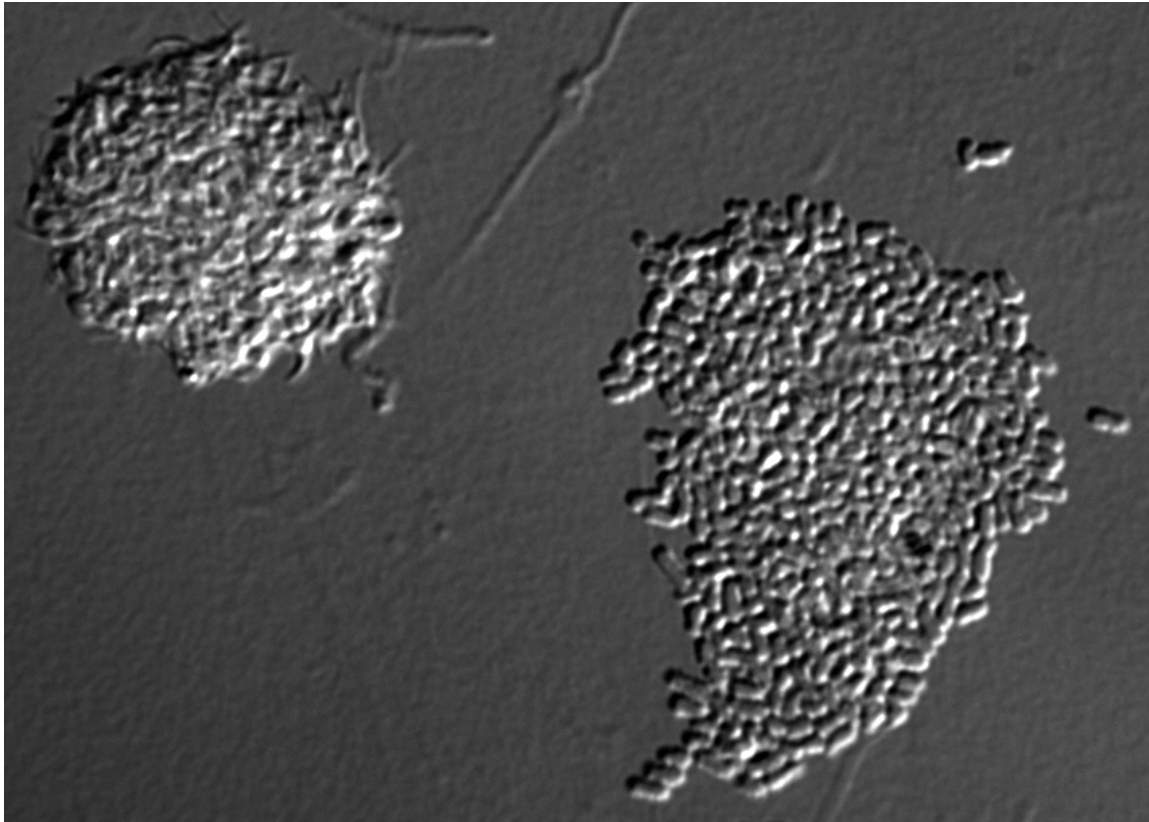

56  
57  
58  
59  
60  
61

**Figure S3. *P. hirschii* forms microcolonies of a single cell type.** Differential interference contrast (DIC) microscopy image of *P. hirschii* microcolonies comprised of tightly packed, non-motile long-stalked cells (left) and motile short-stalked cells (right).

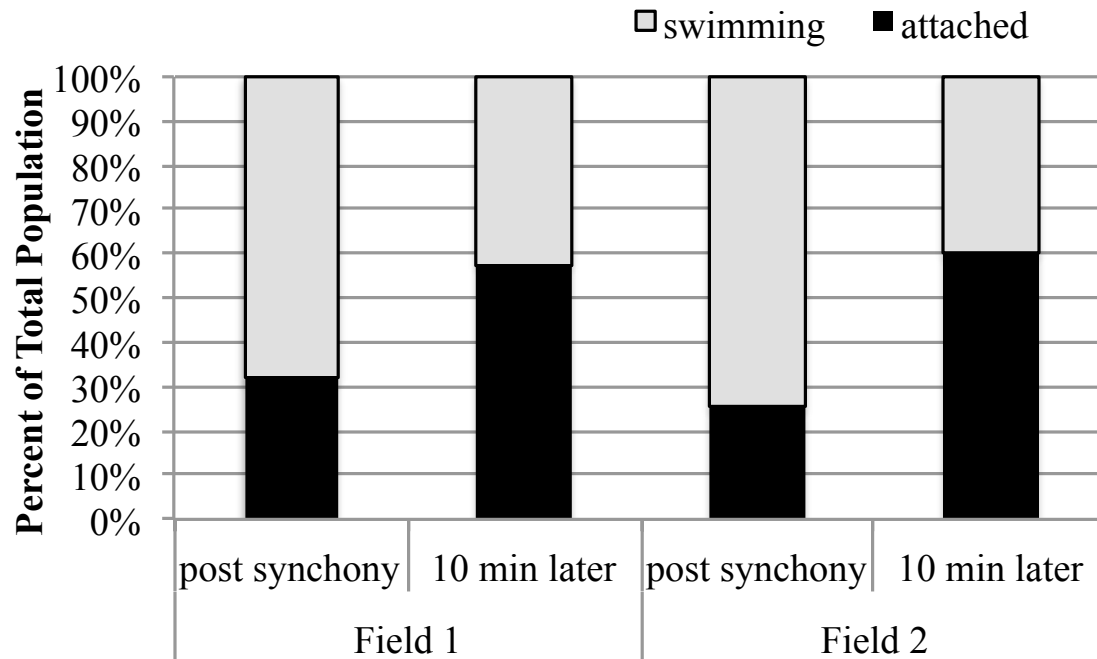

62  
63  
64  
65  
66  
67  
68  
69  
70  
71

**Figure S4. Rapid attachment of motile *P. hirschii* cells.** Quantification of the proportion of swimming and attached cells following cell synchrony. Synchronized cells were collected in the analysis channel and videos were taken within 5 minutes of the synchrony and again 10 minutes later. Each field represents data from an independent synchrony. A total of 40 – 65 cells were classified as swimming or attached in each field at the indicated times. The proportion of attached cells increases from ~30% to 55% within 10 min, in two independent experiments.

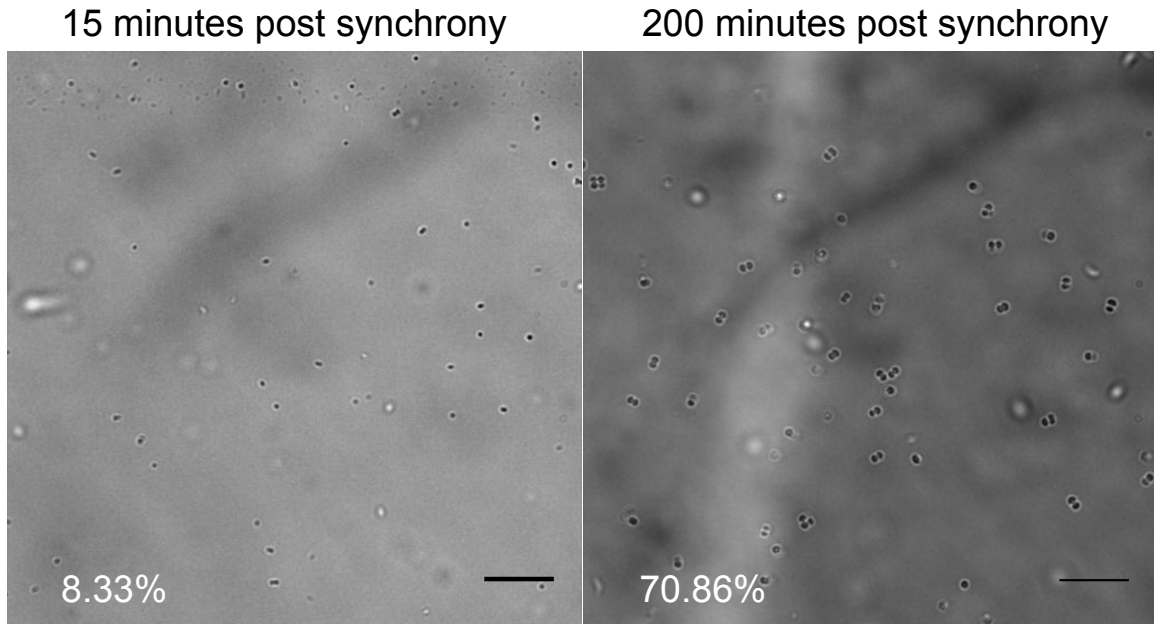

72  
73  
74  
75  
76  
77  
78  
79

**Figure S5. *P. hirschii* cells are synchronized in the microfluidic device.**

Representative white light images of cells attached to the analysis channel 15 and 200 min post synchronization are shown. Quantitation of multiple fields reveals that 15 min post synchrony 8.33% of cells (n=108) have pre-divisional septa, whereas 200 min post synchrony 70.86% of cells (n=127) have pre-divisional septa. Scale bar is 5  $\mu$ m.

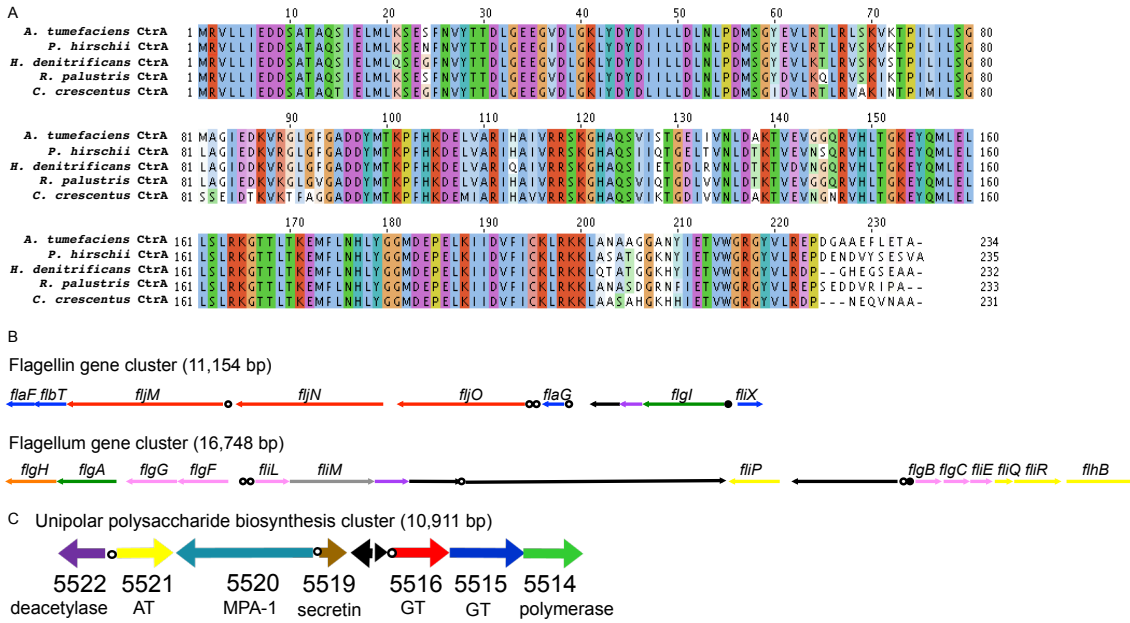

81  
 82  
 83  
 84  
 85  
 86  
 87  
 88  
 89  
 90  
 91  
 92  
 93  
 94  
 95  
 96  
 97  
 98  
 99  
 100  
 101  
 102  
 103

**Figure S6. CtrA may function as a global regulator in *P. hirschii*.** A. Alignment of the CtrA protein from *P. hirschii* to orthologs from other Alphaproteobacteria reveals a high degree of protein identity. *P. hirschii* CtrA is 94.2% identical to CtrA from *A. tumefaciens* (Atu\_2334). Protein alignment was generated with the Clustal Omega program. B. Multiple putative CtrA binding sites are found in gene clusters encoding flagellum genes. The flagellin gene cluster (top panel) includes regulators of flagellin biosynthesis (blue arrows) and the flagellins (red arrows). The gene encoding FlgI, a protein found in the P-ring, is just downstream and has a CtrA binding site in the intergenic region. A flagellum biosynthesis and export cluster (bottom panel) contains multiple CtrA binding sites. This region of genome encodes proteins found in the L-ring (FlgH; orange arrow), P-ring (FlgA; green arrow), rod (FlgG, FlgF, FliL, FlgB, FlgC, and FliE; pink arrows), export apparatus (FliP, FliQ, FliR, FliB; yellow arrows), and C-ring (FliM; grey arrow). CtrA binding sites are indicated by closed black circles (exact match to consensus) and open black circles (one substitution). Purple arrows indicate genes encoding chemotaxis proteins whereas black arrows indicate genes encoding hypothetical proteins. C. Multiple putative CtrA binding sites are observed in the unipolar polysaccharide biosynthesis gene cluster. Colored arrows indicate genes with homology to the *upp* biosynthesis cluster in *A. tumefaciens* as described in the legend for Figure S1. Black genes indicate hypothetical proteins. Putative CtrA binding sites with one substitution are indicated by open black circles.



104 **SUPPLEMENTARY MOVIE FIGURE LEGENDS**

105

106 **Movie S1.** Cell growth of predivisional *P. hirschii* cell is observed on an agarose pad.  
107 Following cell division, the stationary mother cell releases a motile daughter cell.

108

109 **Movie S2.** *P. hirschii* cells form a stable biofilm within the microfluidic device. The  
110 biofilm remains surface associated during media perfusion.

111

112 **Movie S3.** *P. hirschii* cells observed in the analysis channel 5 minutes post-synchrony  
113 highly motile.

114

115 **SUPPLEMENTARY REFERENCES**

116

- 117 1. **Wang Q, Lei Y, Xu X, Wang G, Chen LL.** 2012. Theoretical prediction and  
118 experimental verification of protein-coding genes in plant pathogen genome  
119 *Agrobacterium tumefaciens* strain C58. PLoS One 7:e43176.

120
